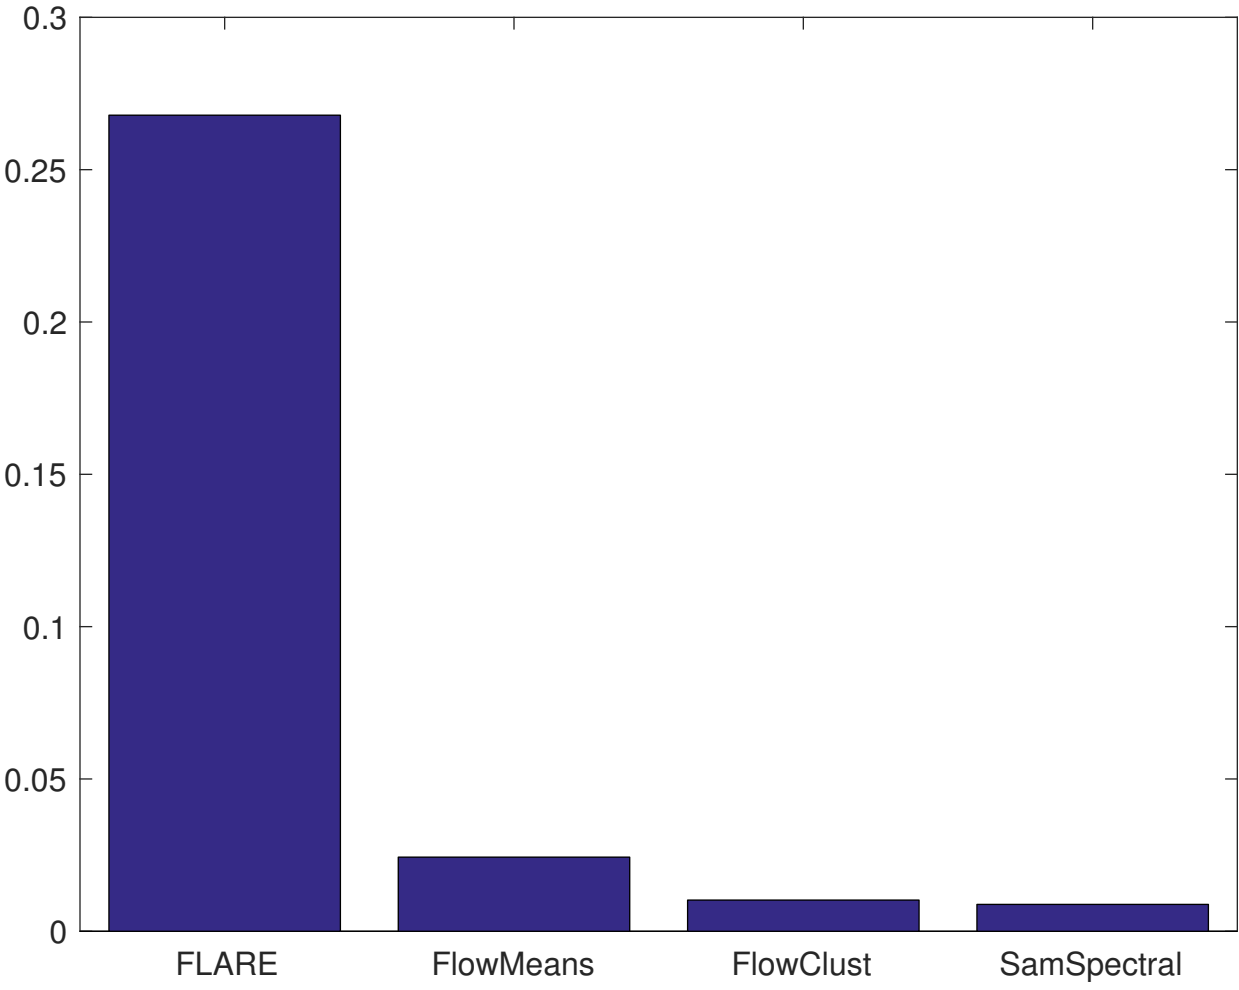

Source: https://storage.googleapis.com/plos-corpus-prod/10.1371/journal.pone.0228651/1/pone.0228651.s003.pdf
